# Supplementary material
Source: HighWire-hosted journal article supplement (https://erj.ersjournals.com/content/55/6/1902345)
Supplement: inline-supplementary-material-2 [file inline-supplementary-material-2.pdf]

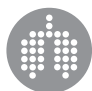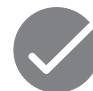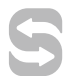

SHAREABLE PDF

# Mepolizumab in a population with severe eosinophilic asthma and corticosteroid dependence: results from a French early access programme

Camille Taillé<sup>1,2,3</sup>, Pascal Chanez<sup>3,4,5</sup>, Gilles Devouassoux<sup>3,6,7</sup>, Alain Didier<sup>3,8</sup>, Christophe Pison<sup>3,9,10</sup>, Gilles Garcia<sup>3,11,12</sup>, Jeremy Charriot <sup>13</sup>, Stéphane Bouée<sup>14</sup>, Alina Gruber<sup>15</sup>, Celine Pribil <sup>15</sup>, Arnaud Bourdin<sup>3,13</sup> and Marc Humbert <sup>3,11,12</sup>

**Affiliations:** <sup>1</sup>Service de Pneumologie, Hôpital Bichat, AP-HP-Nord, Paris, France. <sup>2</sup>INSERM U1152, Université de Paris, Paris, France. <sup>3</sup>INSERM 12, F-CRIN, Clinical Research Initiative In Severe Asthma: a Lever for Innovation & Science (CRISALIS), France. <sup>4</sup>Clinique des bronches allergies et sommeil, CIC nord, C2VN Marseille, Marseille, France. <sup>5</sup>INSERM U1062, Dept of Respiratory Diseases, Aix-Marseille University, Marseille, France. <sup>6</sup>Service de Pneumologie, Hôpital de la Croix Rousse, Hospices Civils de Lyon, Lyon, France. <sup>7</sup>Université Claude Bernard Lyon 1, Villeurbanne, France. <sup>8</sup>Service de Pneumologie, Hôpital Larrey CHU de Toulouse, Toulouse, France. <sup>9</sup>Service Hospitalier Universitaire Pneumologie Physiologie, Pôle Thorax et Vaisseaux, Université Grenoble Alpes, CHU Grenoble Alpes, Grenoble, France. <sup>10</sup>INSERM U1055, Université Grenoble Alpes, La Tronche, France. <sup>11</sup>Université Paris-Sud, and Université Paris-Saclay, Hôpital Bicêtre, Le Kremlin-Bicêtre, Paris, France. <sup>12</sup>Service de Pneumologie et Soins Intensifs Respiratoires and INSERM U999, Hôpital Bicêtre, AP-HP, Le Kremlin-Bicêtre, Paris, France. <sup>13</sup>Service de Pneumologie and INSERM CNRS, CHU Montpellier, Université de Montpellier, Montpellier, France. <sup>14</sup>Real World Evidence, CEMKA, Bourg La Reine, France. <sup>15</sup>Laboratoire GSK France, Rueil Malmaison, France.

**Correspondence:** Marc Humbert, Service de Pneumologie et Soins Intensifs Respiratoires, Hôpital Bicêtre, 78 rue du Général Leclerc, 94270 Le Kremlin-Bicêtre, Paris, France. E-mail: marc.humbert@daphp.fr

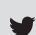

@ERSpublications

Mepolizumab is associated with improvements in several clinically meaningful outcomes and demonstrates a favourable safety profile in a population with severe eosinophilic asthma, outside of the controlled environment of a clinical trial <https://bit.ly/3bckeQ3>

**Cite this article as:** Taillé C, Chanez P, Devouassoux G, *et al.* Mepolizumab in a population with severe eosinophilic asthma and corticosteroid dependence: results from a French early access programme. *Eur Respir J* 2020; 55: 1902345 [<https://doi.org/10.1183/13993003.02345-2019>].

This single-page version can be shared freely online.

## ABSTRACT

**Background:** Mepolizumab was available in France as part of an early access programme for patients with severe eosinophilic asthma (nominative *autorisation temporaire d'utilisation* [temporary use authorisation] (nATU)) before its commercialisation. This study aimed to characterise patients who received mepolizumab in the nATU.

**Methods:** This retrospective, observational study analysed data from the hospital medical records of patients up to 24 months after treatment initiation. Study objectives were to describe patient baseline characteristics, the evolution of disease severity and treatment modifications during follow-up; safety was also investigated.

**Findings:** Overall, 146 patients who received  $\geq 1$  dose of mepolizumab were included. At inclusion, patients had a mean age of 58.2 years with a mean severe asthma duration of 13.4 years, and 37.0% had

respiratory allergies. Patients experienced, on average, 5.8 exacerbations per patient per year at baseline, 0.6 and 0.5 of which required hospitalisation and emergency department visits, respectively. These values improved to 0.6, 0.1 and 0.1 exacerbations per patient per year, respectively, at 24 months of follow-up. Most patients (92.8%) were using oral corticosteroids at baseline, compared with 34.7% by 24 months of follow-up. Moreover, mean blood eosinophil counts improved from  $722 \text{ cells} \cdot \mu\text{L}^{-1}$  at baseline to  $92 \text{ cells} \cdot \mu\text{L}^{-1}$  at 24 months of follow-up; lung function and asthma control followed a similar trend.

**Interpretation:** Results confirm findings from clinical trials, demonstrating that mepolizumab is associated with important improvements in several clinically meaningful outcomes and has a favourable safety profile in a population with severe eosinophilic asthma, outside of the controlled environment of a clinical trial.
